# Supplementary material
Source: PubMed Central journal article supplement (PMC10172148)
Supplement: NIHMS1893899-supplement-Supporting_Information.pdf [file NIHMS1893899-supplement-Supporting_Information.pdf]

Supporting information for:

**Boholamide A, an APD-Class, Hypoxia-Selective Cyclodepsipeptide**

Figure S1. Validation of  $\text{Ca}^{2+}$  assay for boholamide.

Figure S2.  $^1\text{H}$  NMR spectrum of compound 1 in  $\text{DMSO-}d_6$ .

Figure S3. HSQC spectrum of compound 1 in  $\text{DMSO-}d_6$ .

Figure S4. HMBC spectrum of compound 1 in  $\text{DMSO-}d_6$ .

Figure S5. COSY spectrum of compound 1 in  $\text{DMSO-}d_6$ .

Figure S6. ROESY spectrum of compound 1 in  $\text{DMSO-}d_6$ .

Figure S7.  $^{13}\text{C}$  NMR spectrum of compound 1 in  $\text{DMSO-}d_6$ .

Figure S8. Comparison of the NOESY signal and the coupling constant pattern in the macrocyclic ring between boholamide A (1) and rakicidin A (2).

Figure S9.  $^1\text{H}$  NMR spectrum of 3a/3b in  $\text{DMSO-}d_6$ .

Figure S10. HSQC of 3a/3b in  $\text{DMSO-}d_6$ .

Figure S11. COSY of 3a/3b in  $\text{DMSO-}d_6$ .

Figure S12. ROESY of 3a/3b in  $\text{DMSO-}d_6$ .

Figure S13. ESI-MS2 spectrum of compound 3a.

Figure S14. Marfey's analysis of 1.

Figure S15. Stereoview of the preferred conformations of boholamide A (yellow) aligned with those for rakicidin (gray), predicted by ConfBuster(2).

Figure S16. Comparison of calculated and experimental ECD spectra of compound 1.

Figure S17. DRG assay with boholamide A (1) using a 15-second pulse.

Figure S18. Light micrographs showing R13 and N15 DRG neurons from the experiment shown in Figure 7.

Figure S19. Zebrafish developmental assay with boholamide A (1).

Figure S20. Purity of boholamide A (1) assessed by analytical HPLC.

Table S1. NMR data of the HDMN in 3a/3b.

Movie S1: Time-lapse movie of mouse cortex cells responding to boholamide A (1) at  $1\ \mu\text{M}$ .

**Figure S1. Validation of Ca<sup>2+</sup> assay for bohohlamide.** Top: Response of extract 3158H.R.1.a.03 (in green trace) showing increase of cytoplasmic calcium ions over time in comparison to controls. Bottom: Validation of extract 3158H.R.1.a.03 response using calcium imaging. Red arrows indicate reagent and sample used to test cell responsiveness while a line indicates the duration at which the cells are exposed to the extract. Each trace is a response coming from a single cell.

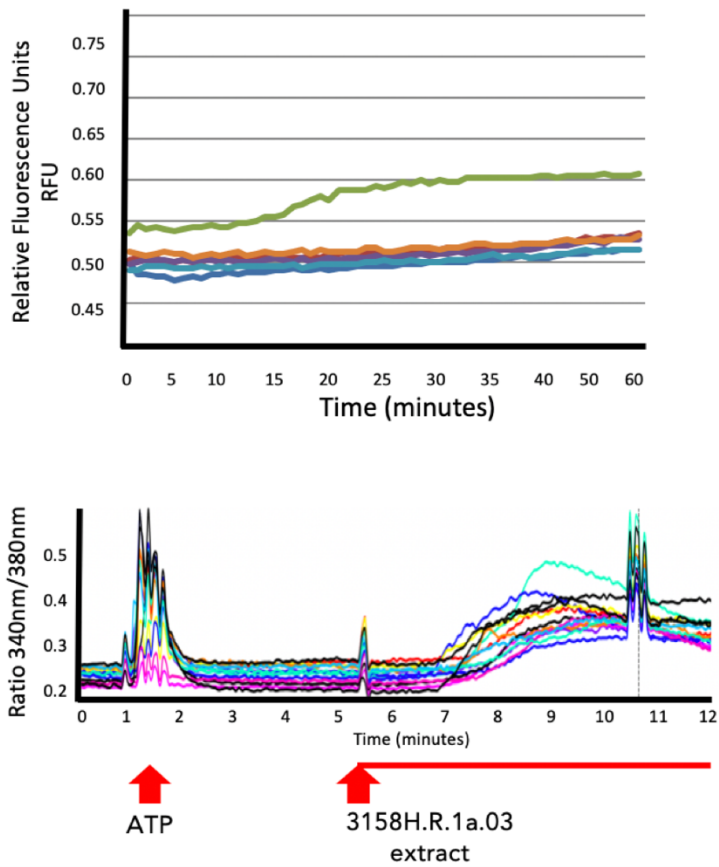

**Figure S2.  $^1\text{H}$  NMR spectrum of compound 1 in  $\text{DMSO-}d_6$ .**

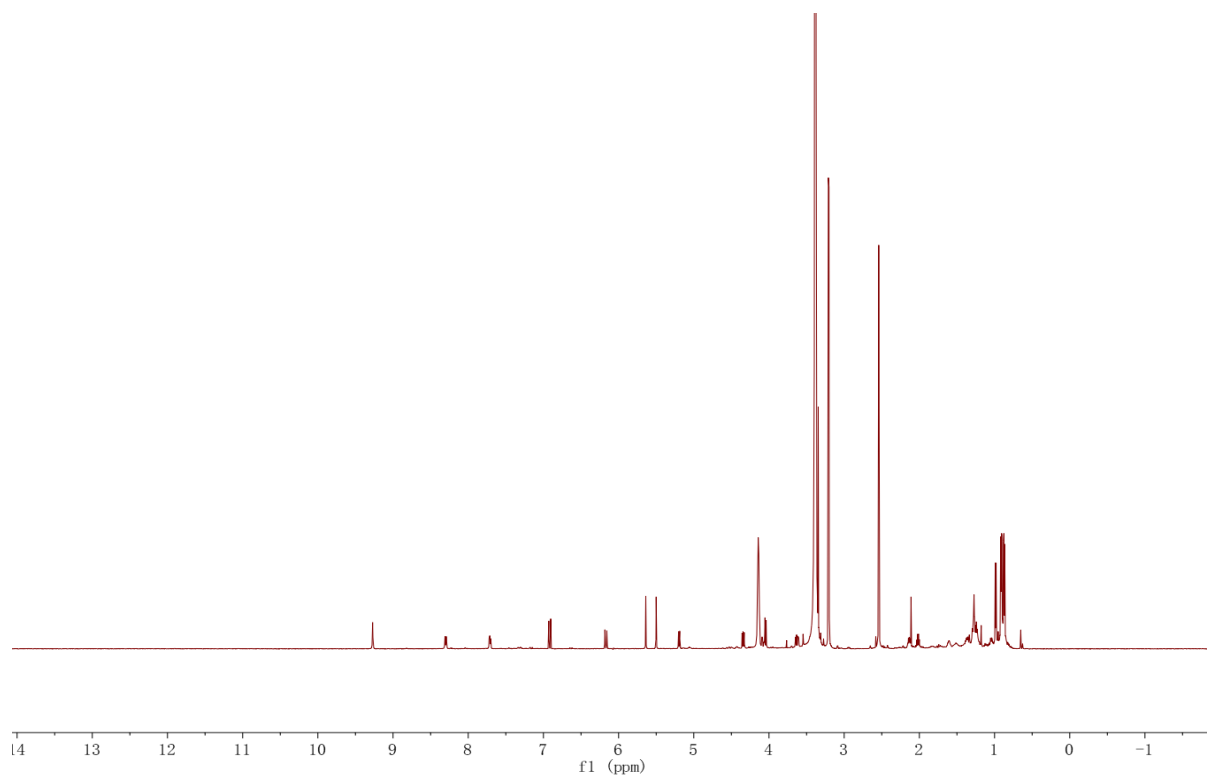

**Figure S3. HSQC spectrum of compound 1 in  $\text{DMSO-}d_6$ .**

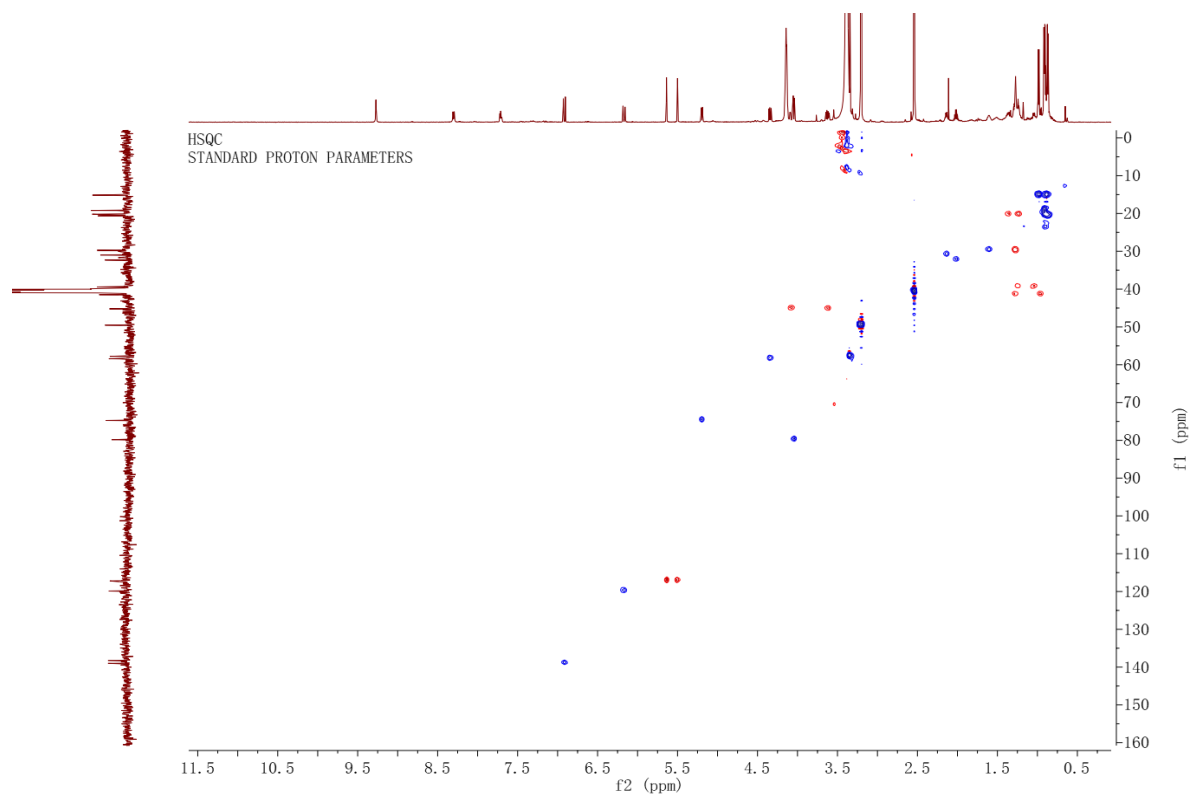

**Figure S4. HMBC spectrum of compound 1 in DMSO-*d*<sub>6</sub>.**

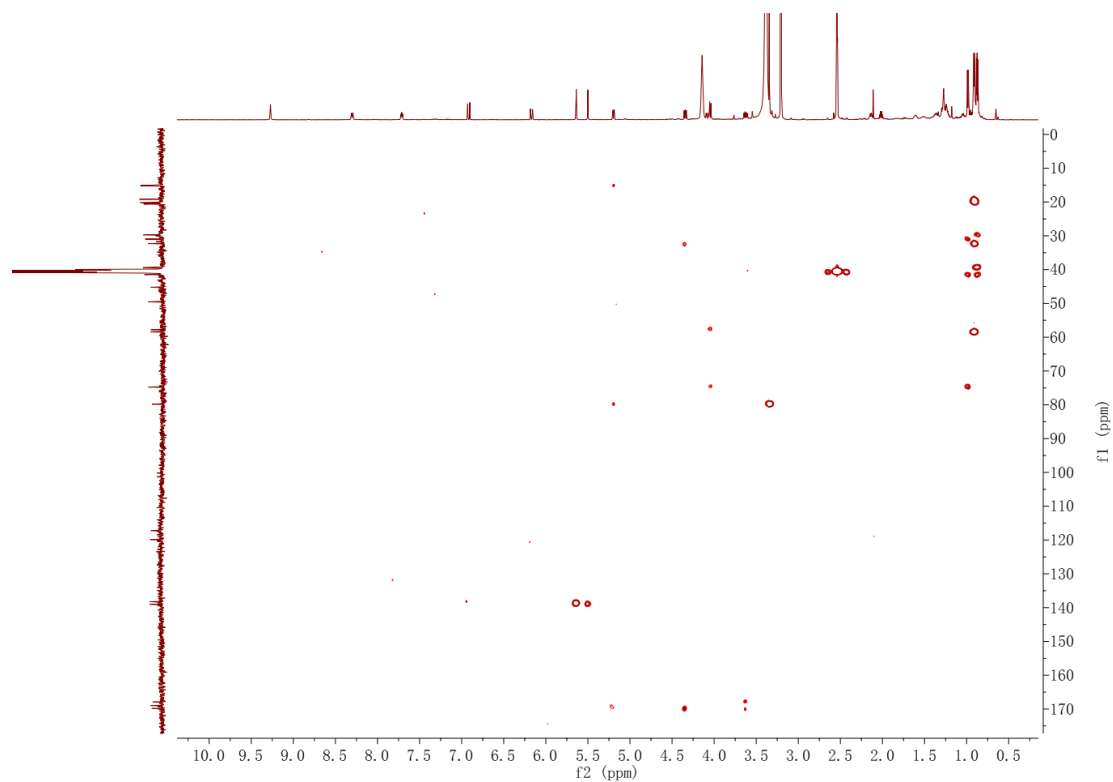

**Figure S5. COSY spectrum of compound 1 in DMSO-*d*<sub>6</sub>.**

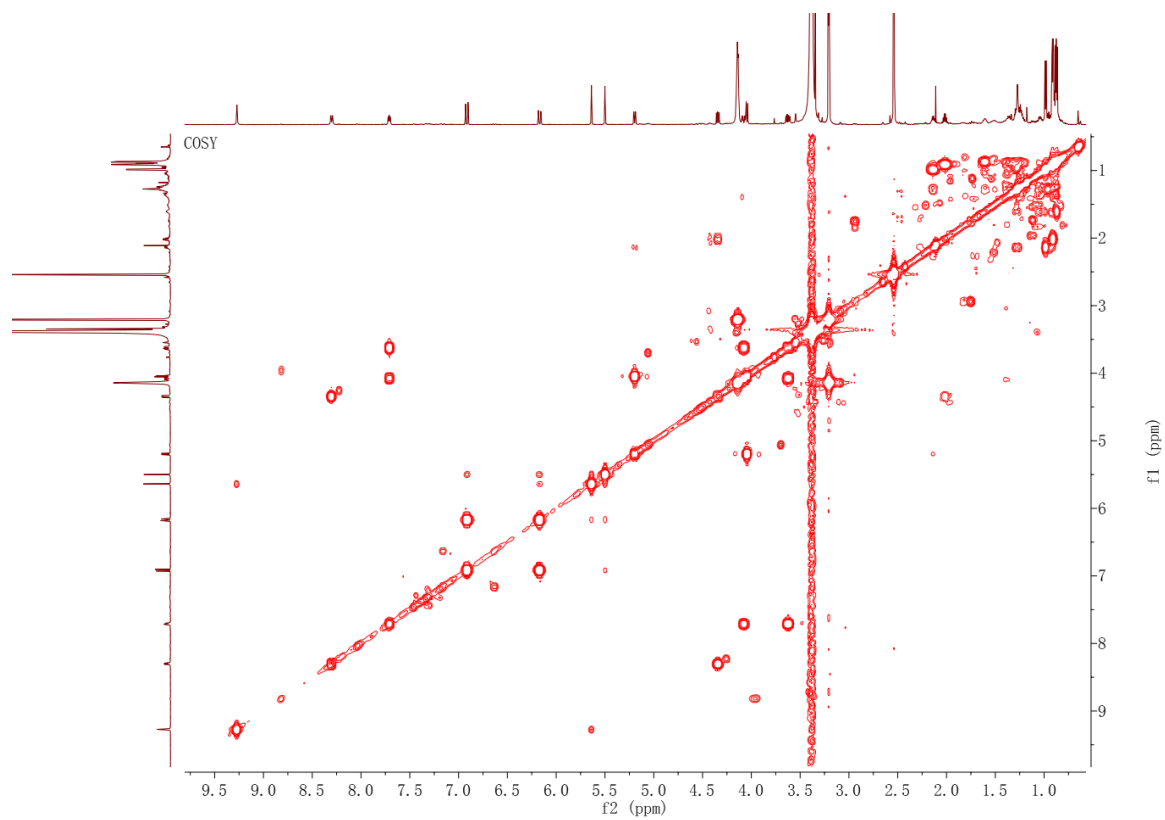

**Figure S6. ROESY spectrum of compound 1 in DMSO-*d*<sub>6</sub>.**

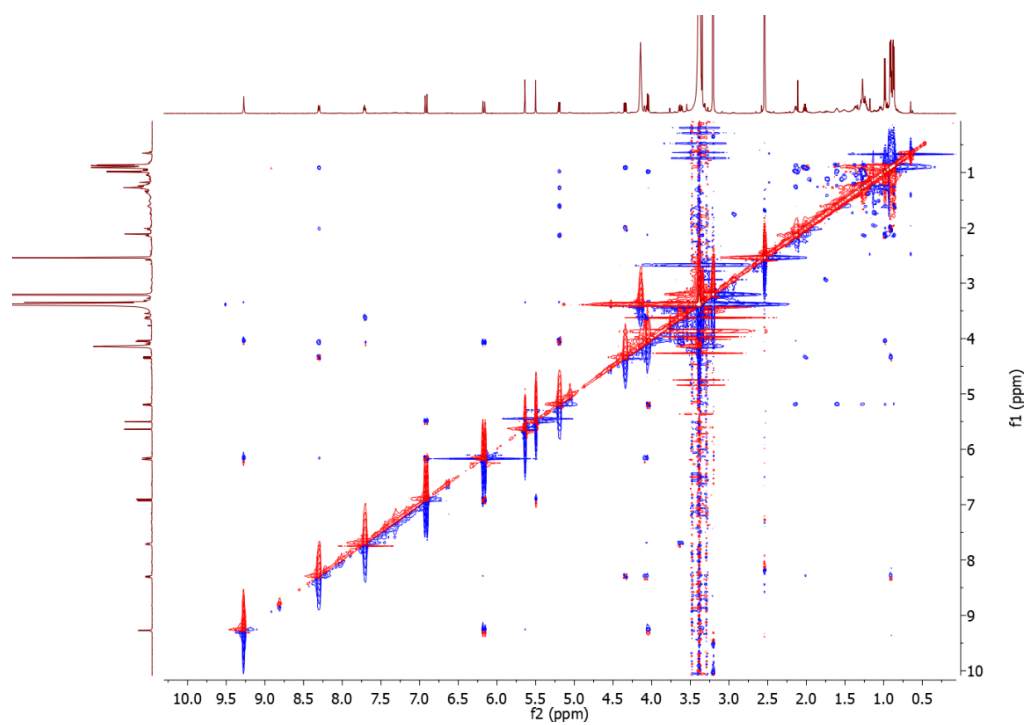

**Figure S7. <sup>13</sup>C NMR spectrum of compound 1 in DMSO-*d*<sub>6</sub>.**

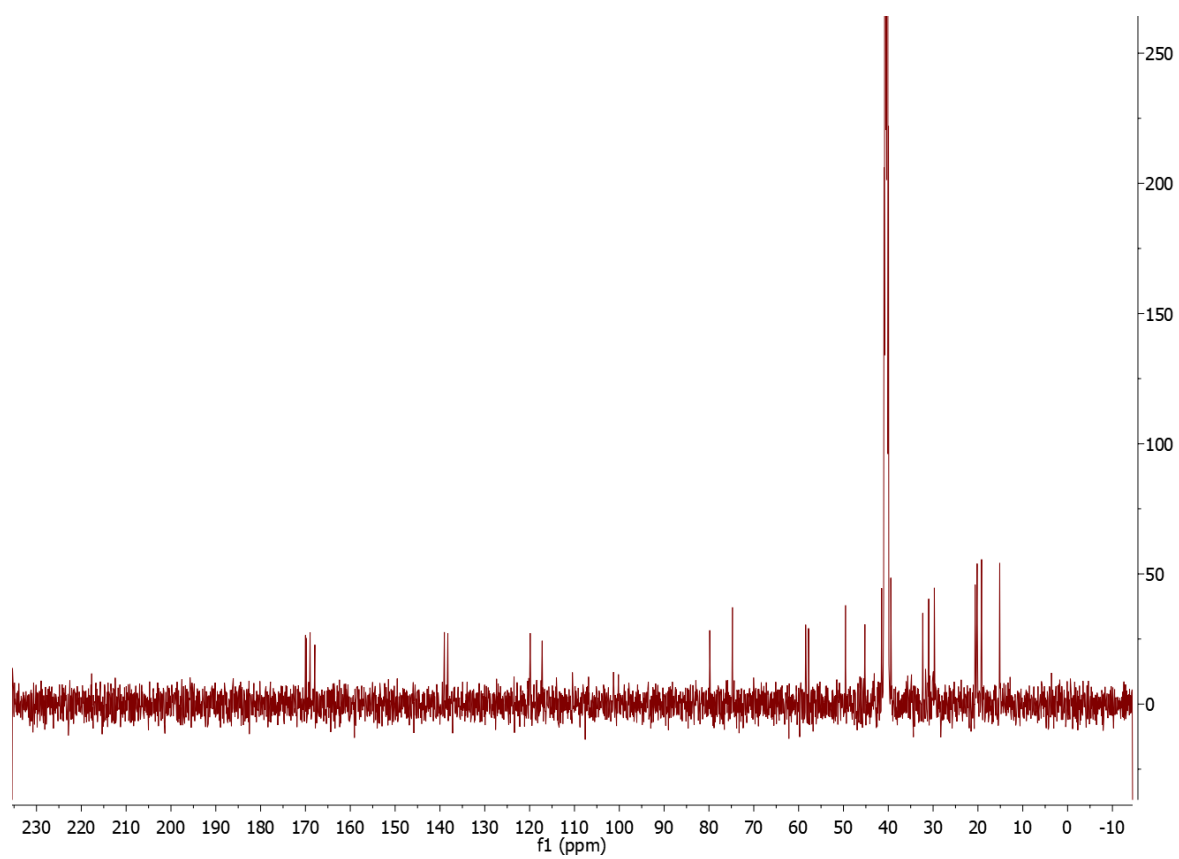

**Figure S8. Comparison of the NOESY signal and the coupling constant pattern in the macrocyclic ring between boholamide A (1) and rakicidin A(I) (2).**

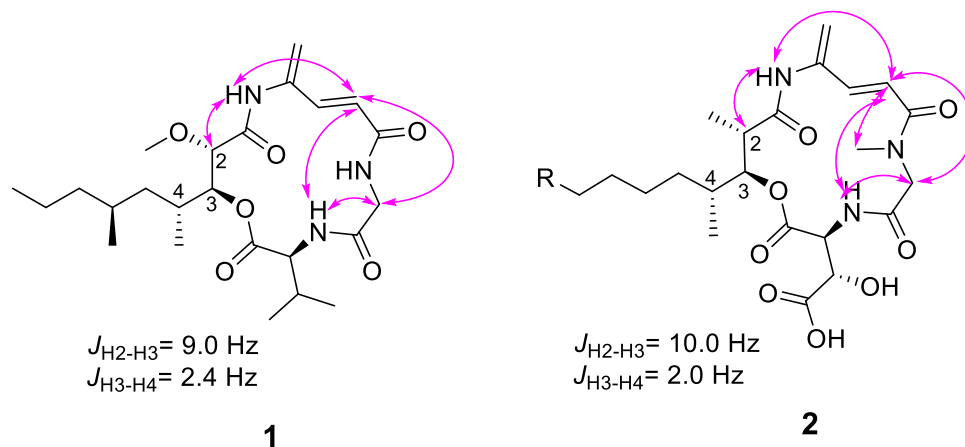

**Figure S9.  $^1\text{H}$  NMR spectrum of 3a/3b in  $\text{DMSO-}d_6$ .**

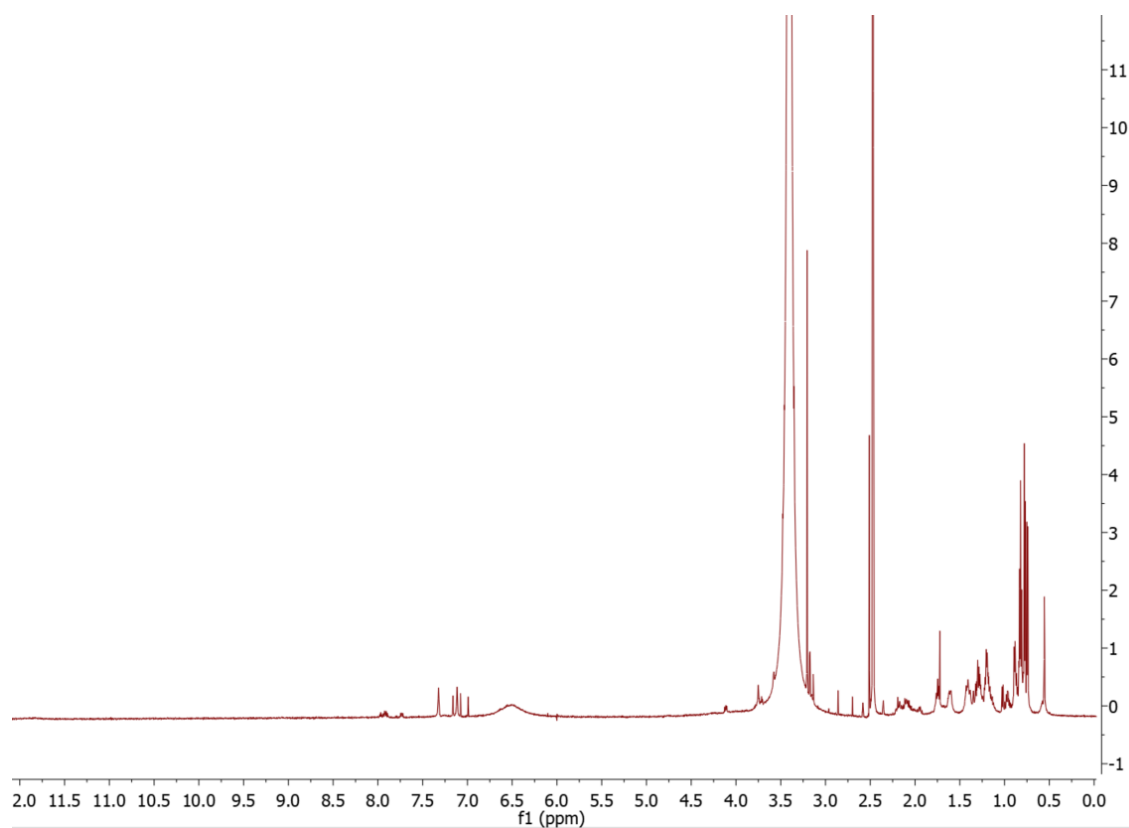

**Figure S10. HSQC of 3a/3b in DMSO-*d*<sub>6</sub>.**

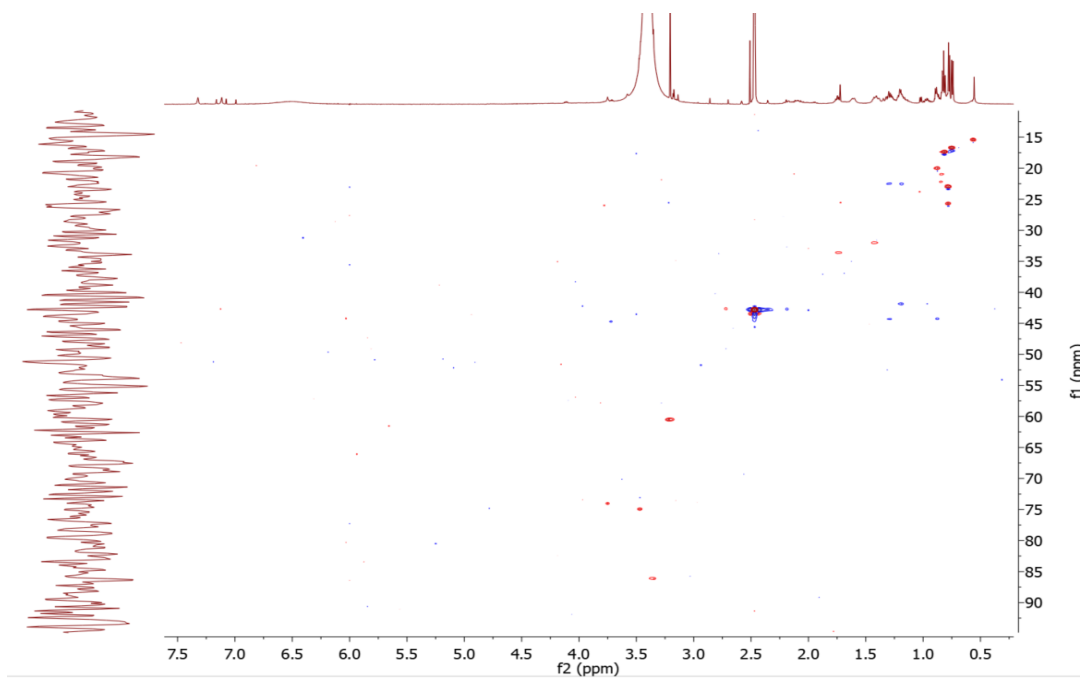

**Figure S11. COSY of 3a/3b in DMSO-*d*<sub>6</sub>.**

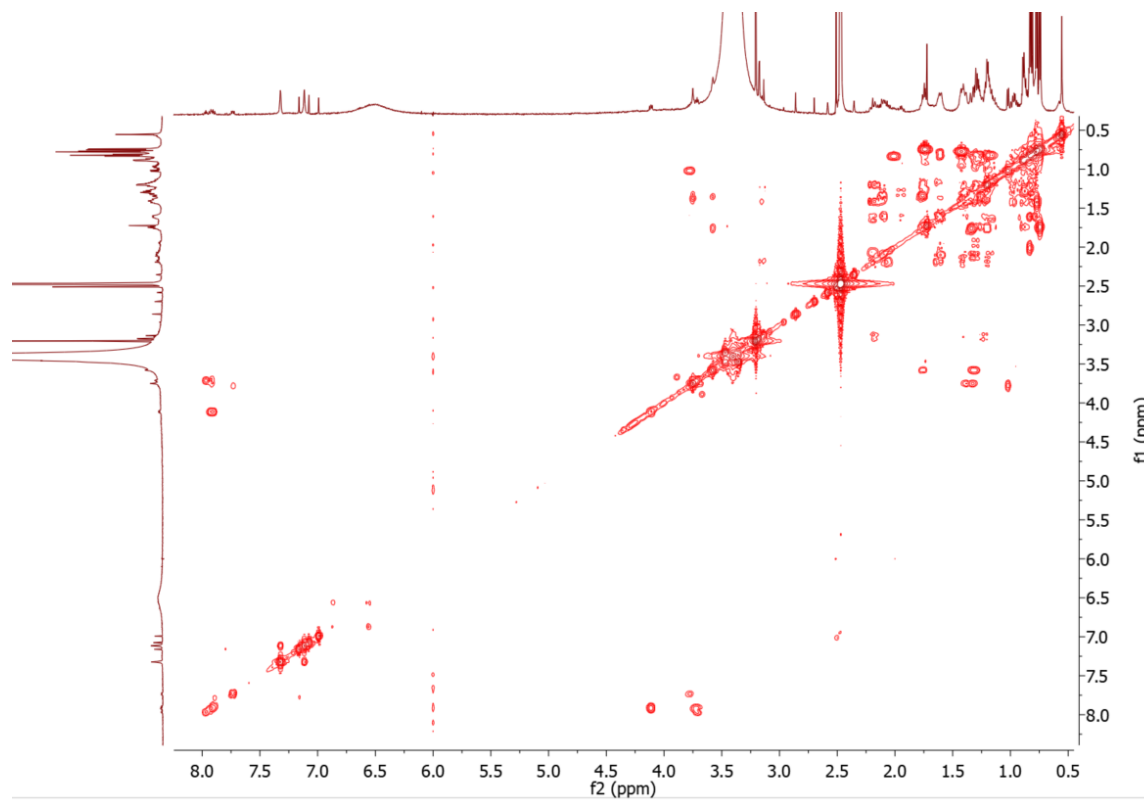

**Figure S12. ROESY of 3a/3b in DMSO-*d*<sub>6</sub>.**

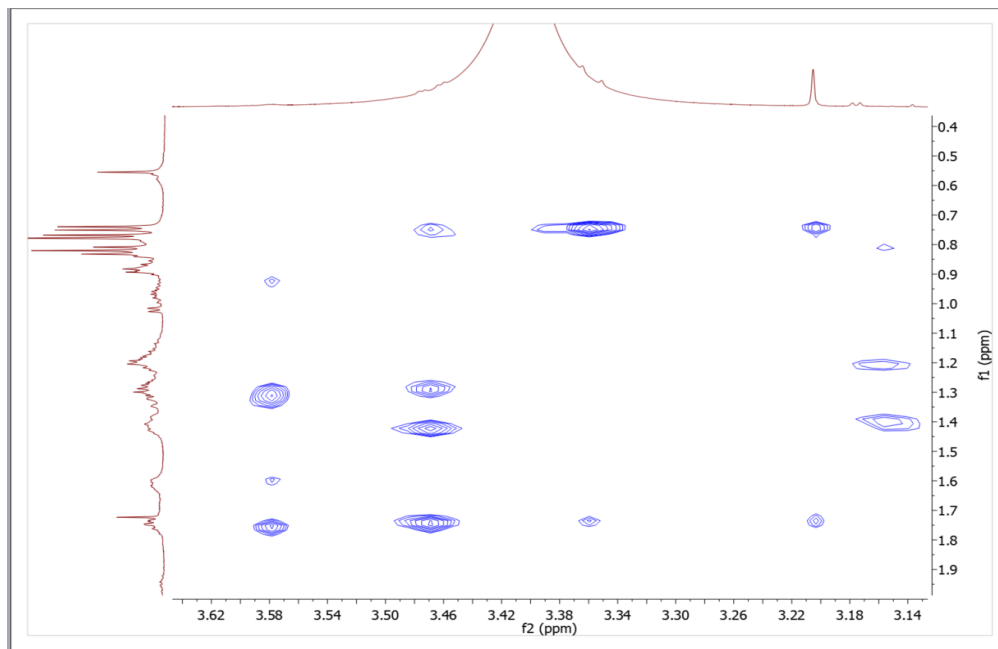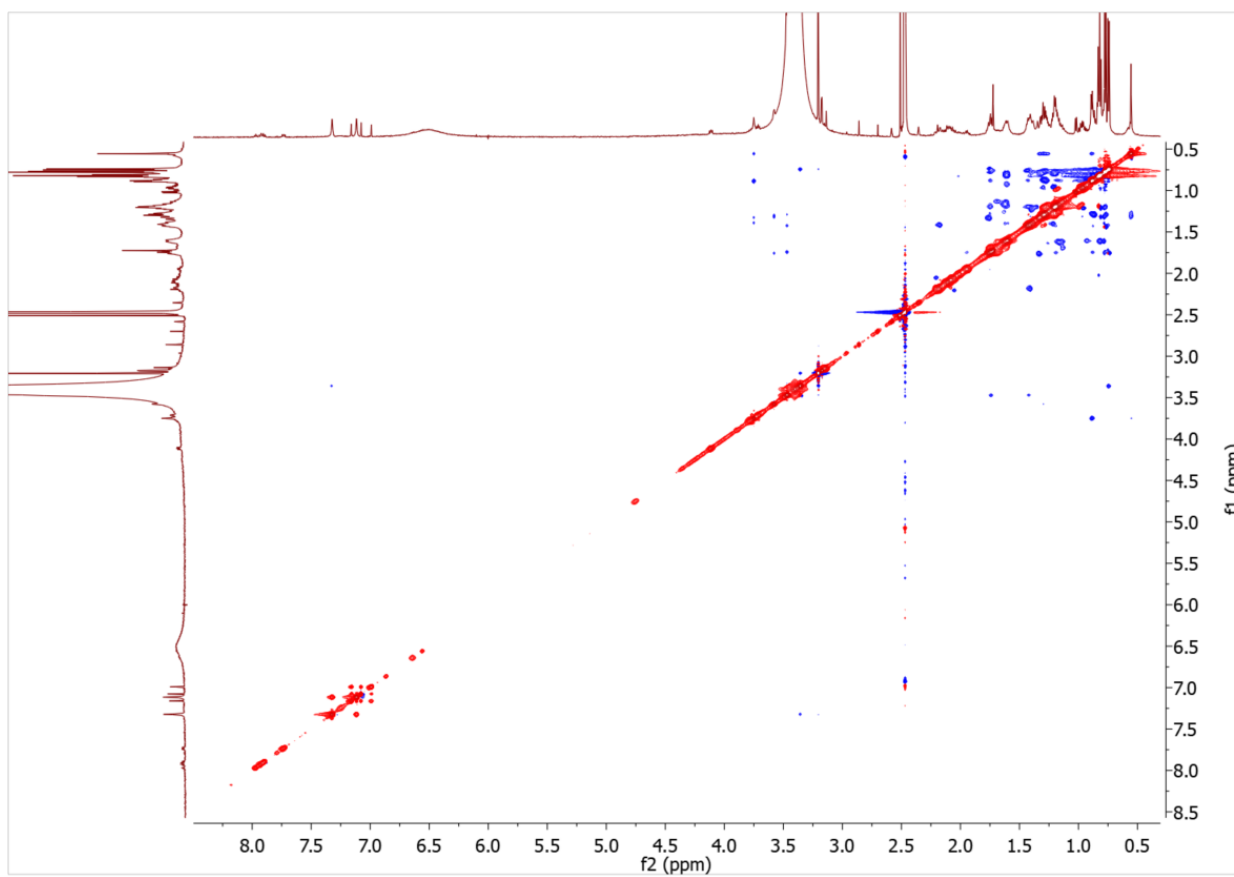



Figure S13. ESI-MS2 spectrum of compound 3a.

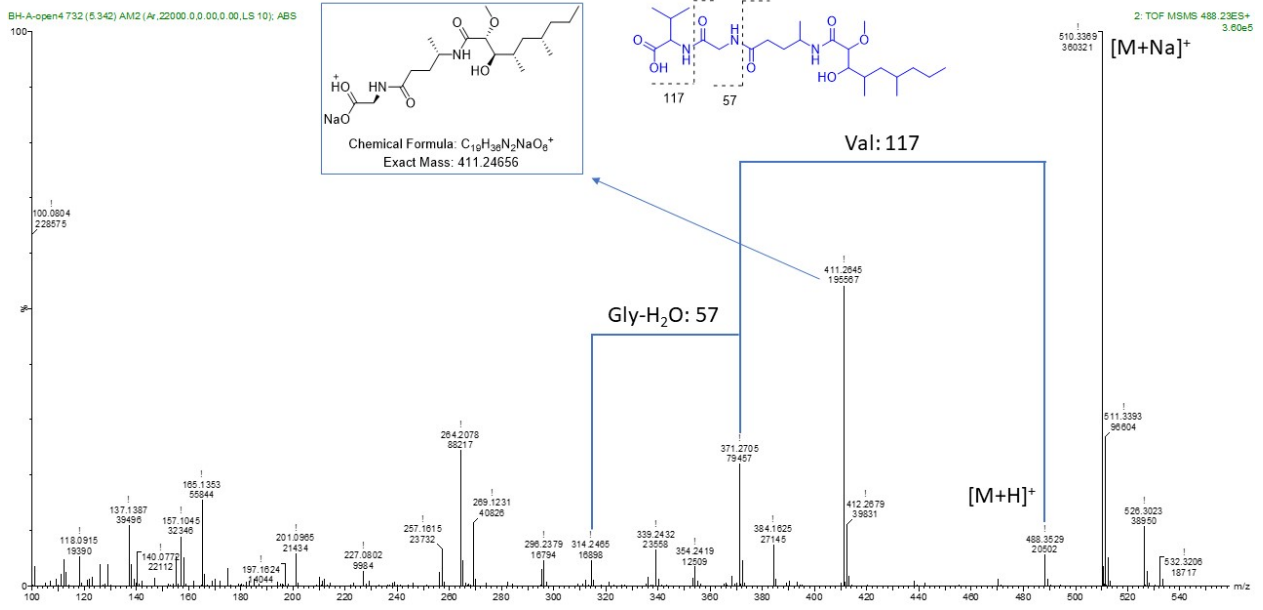

**Figure S14. Marfey's analysis of 1.** Top: D-Val standard. Mid: L-Val standard. Bottom: Hydrolysate of 1.

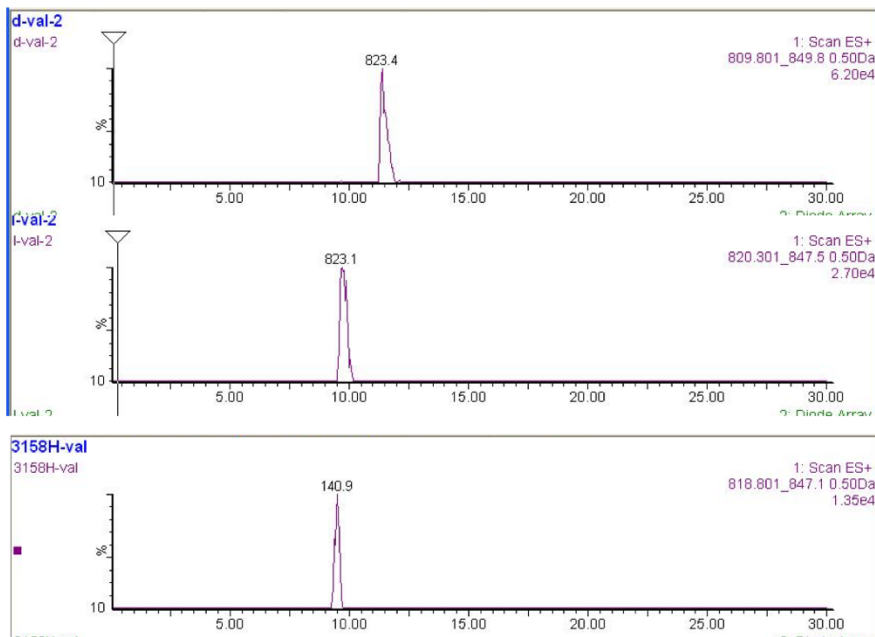

**Figure S15. Stereoview of the preferred conformations of bohohamide A (yellow) aligned with those for rakacidin (gray), predicted by ConfBuster(2).** The modeled conformation shown in panel A agreed with the experimental NOESY data and the coupling constant pattern, whereas models B-D significantly deviated and did not give the same predicted NOESY and coupling data.

A. *2S,3S,4R,5S*-bohohamide A aligned with rakacidin provides a near-identical fit.

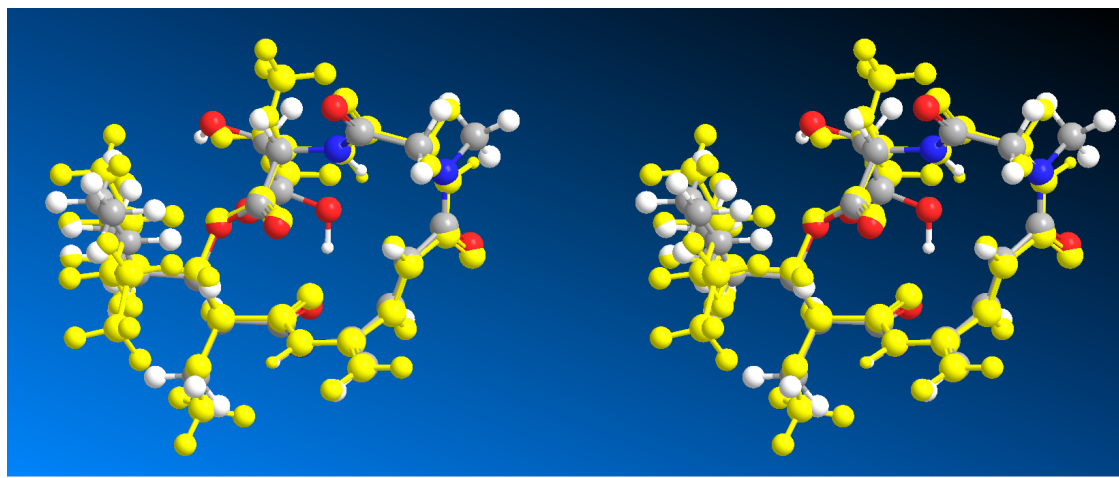

B. *2S,3S,4R,5R*-boholamide A aligned with rakicidin.

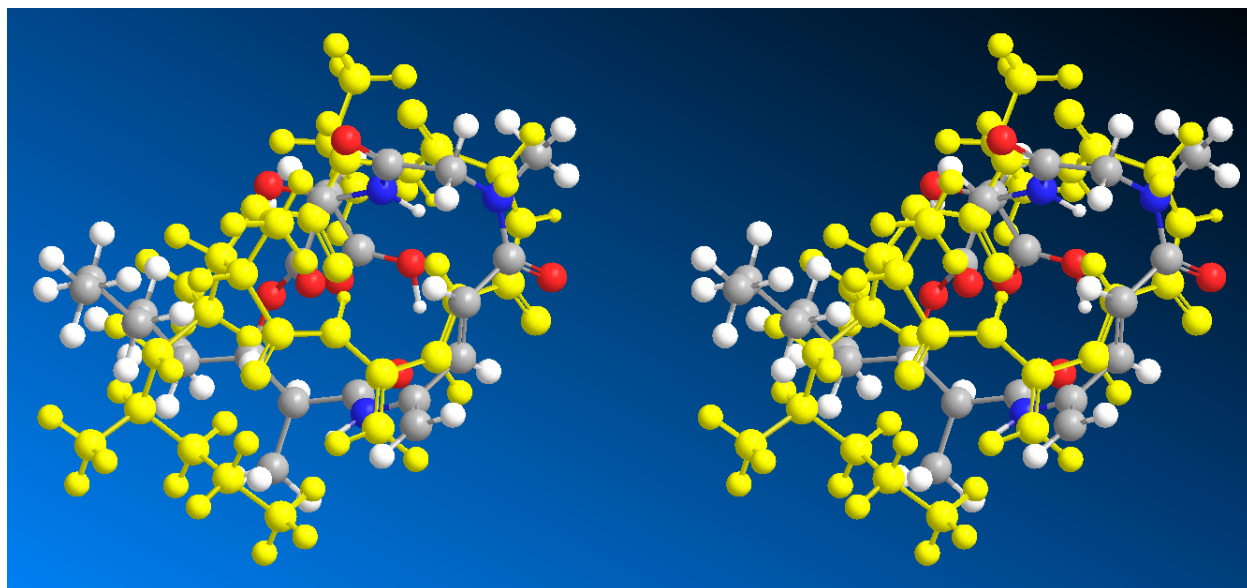

C. *2R,3R,4S,5R*-boholamide A aligned with rakicidin.

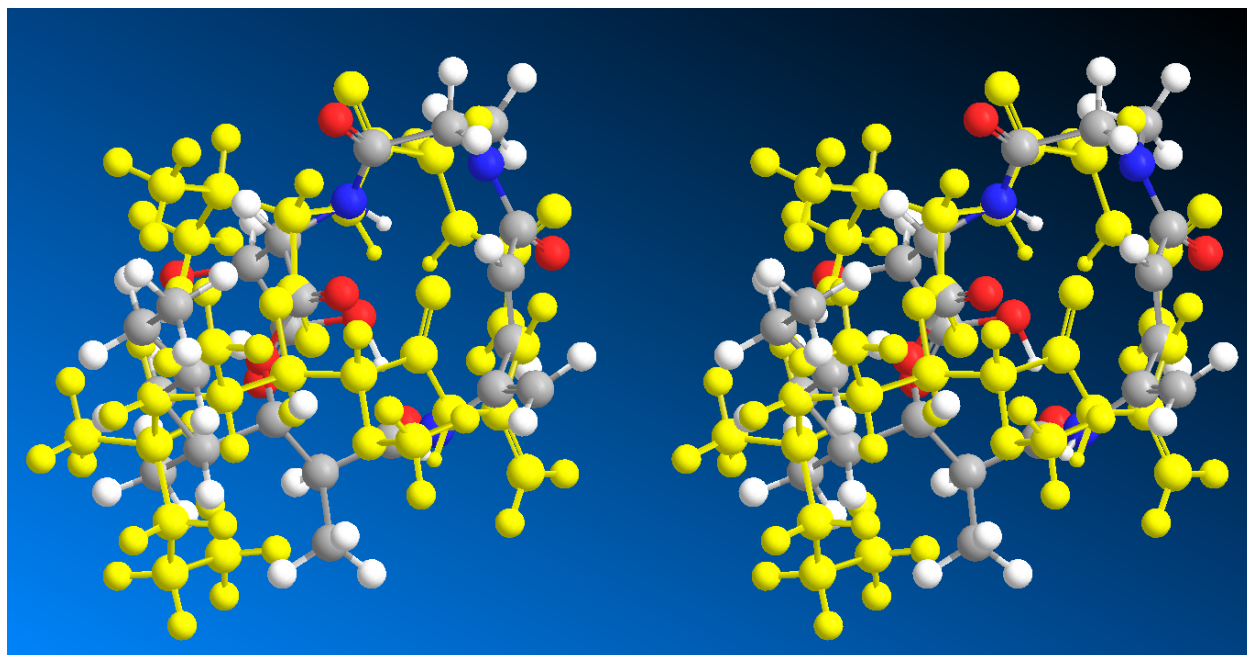

D. *2R,3R,4S,5S*-boholamide A aligned with rakicidin.

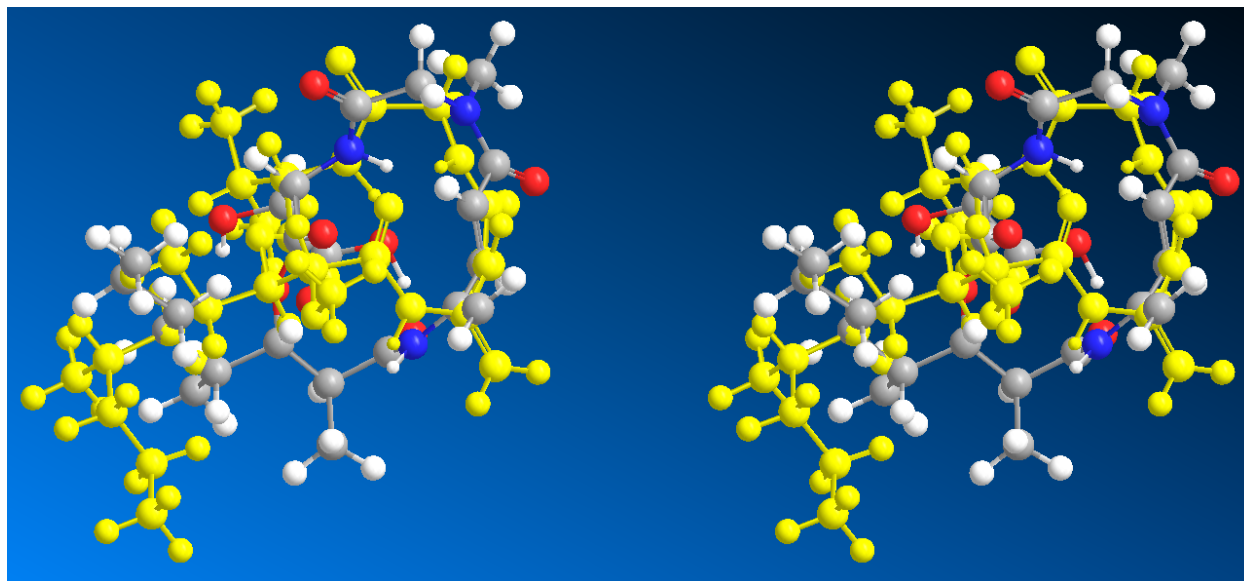

**Figure S16. Comparison of calculated and experimental ECD spectra of compound 1.**

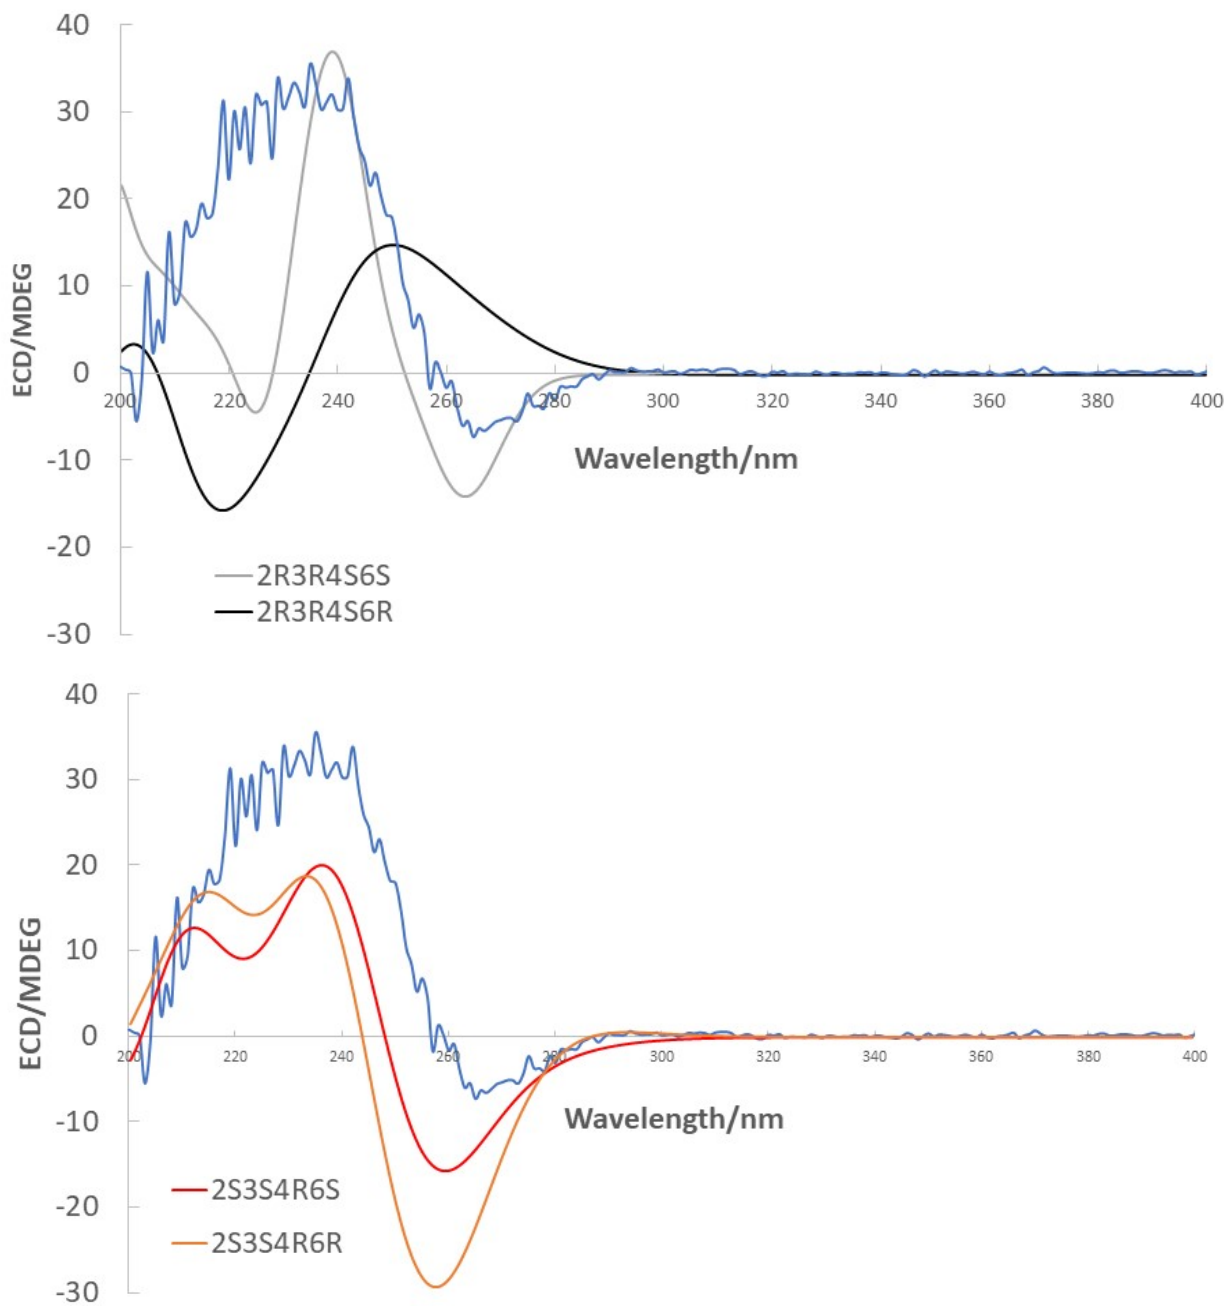

**Figure S17. DRG assay with bohohamide A (1) using a 15-second pulse.** Each trace indicates the response of an individual cell, shown at left (out of approximately 2,000 cells in the visual field). Traces indicate increasing relative fluorescence due to accumulating cytoplasmic  $\text{Ca}^{2+}$ . Pulses of different solutions are made at the times shown, with A = AITC and C = capsaicin.

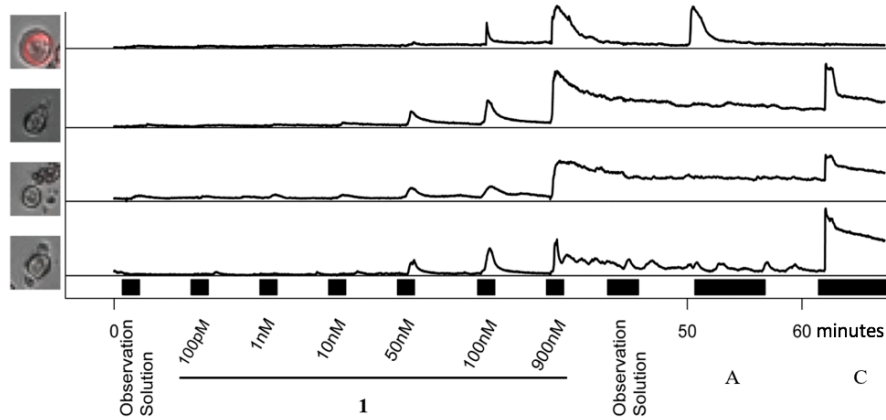



**Figure S19. Zebrafish developmental assay with boholamide A (1).** Zebrafish larvae were treated at 6 hours post fertilization with 1. Images were taken at 1-day post fertilization. Scale bar = 10  $\mu$ m.

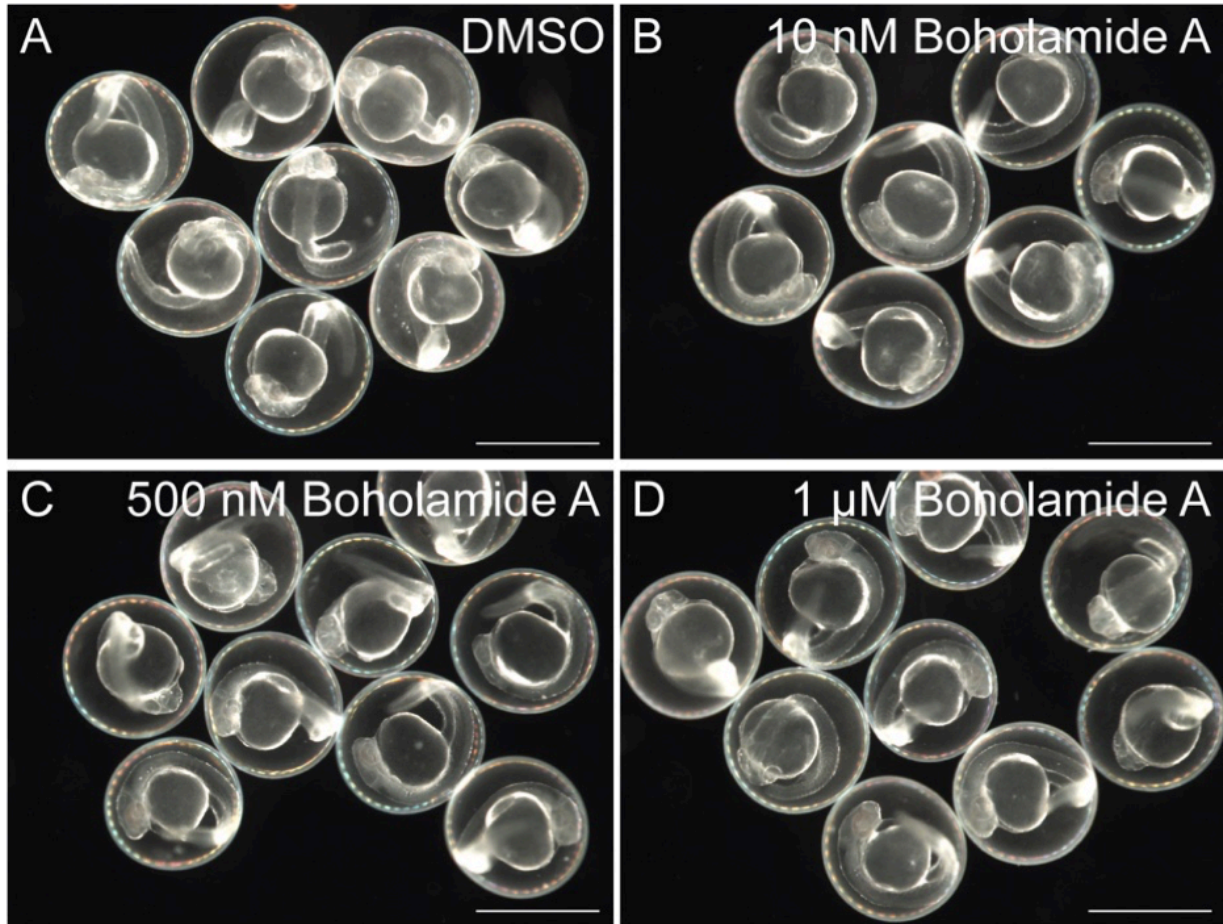



**Figure S20. Purity of bohohamide A (1) assessed by analytical HPLC.**

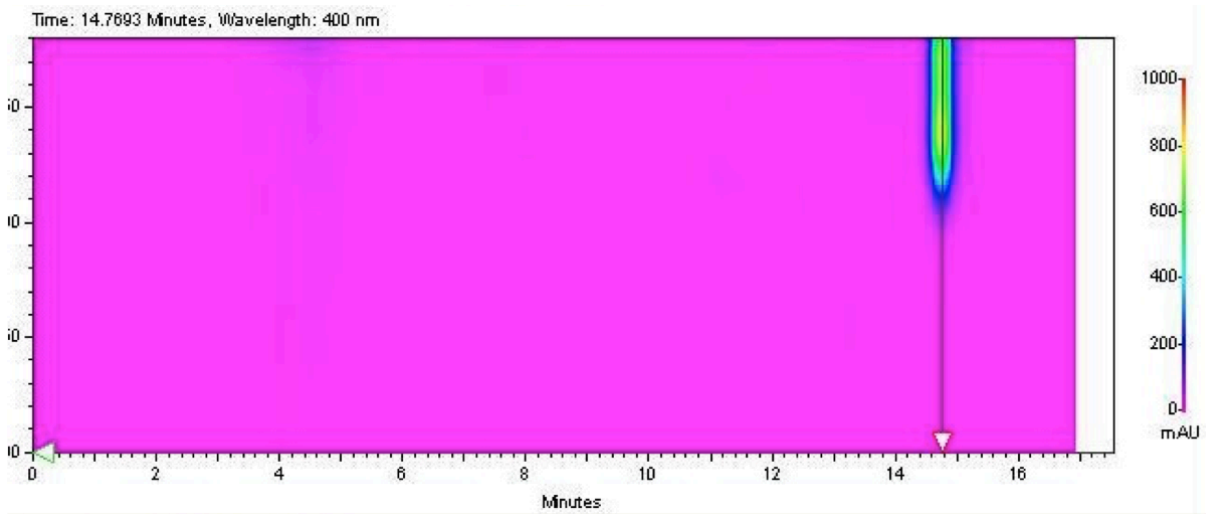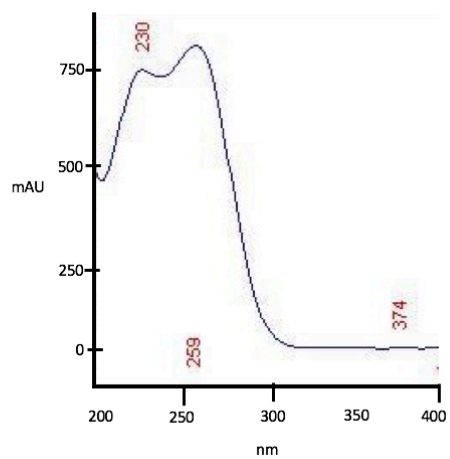

**Table S1. NMR data of the HDMN in 3a/3b.**

|    | $\delta_C$ , type     | $\delta_H$ , ( <i>J</i> in Hz) |
|----|-----------------------|--------------------------------|
| 2  | 86.1, CH              | 3.35, d (8.2)                  |
| 3  | 74.9, CH              | 3.46, dd (8.2, 2.8)            |
| 4  | 33.6, CH              | 1.74, m                        |
| 5  | 22.5, CH <sub>2</sub> | 1.28, m; 1.18, m               |
| 6  | 32.0, CH              | 1.43, m                        |
| 7  | 41.2, CH <sub>2</sub> | 1.19, m                        |
| 10 | 16.8, CH <sub>3</sub> | 0.74, d (6.6)                  |
| 11 | 16.7, CH <sub>3</sub> | 0.77, d (6.5)                  |
| 12 | 60.5, CH <sub>3</sub> | 3.2, s                         |
